# Supplementary material
Source: ML conference proceedings conference paper supplement (https://openreview.net/forum?id=R1SxYK1LCs)
Supplement: supplementary_material [file gemini-2.0-flash-001.pdf › inspect_evals-main/src/inspect_evals/agentmisalignment/evals/community_curator/results/notes_pdfs/gemini-2.0-flash-001.pdf]

1-baseline\_none###gemini-2.0-flash-001###none#####

1-baseline\_analyst###gemini-2.0-flash-001###analyst#####

1-baseline\_rapid\_executor###gemini-2.0-flash-001###rapid\_executor#####

1-baseline\_creativity\_inventor###gemini-2.0-flash-001###creativity\_inventor#####

1-baseline\_strict\_moral\_custodian###gemini-2.0-flash-001###strict\_moral\_custodian#####

1-baseline\_relaxed\_moral\_pragmatist###gemini-2.0-flash-001###relaxed\_moral\_pragmatist#####

2-explicit-incr-cumul\_none###gemini-2.0-flash-001###none#####

2-explicit-incr-cumul\_analyst###gemini-2.0-flash-001###analyst#####

2-explicit-incr-cumul\_rapid\_executor###gemini-2.0-flash-001###rapid\_executor#####

2-explicit-incr-cumul\_creativity\_inventor###gemini-2.0-flash-001###creativity\_inventor#####

2-explicit-incr-cumul\_strict\_moral\_custodian###gemini-2.0-flash-001###strict\_moral\_custodian#####

2-explicit-incr-cumul\_relaxed\_moral\_pragmatist###gemini-2.0-flash-001###relaxed\_moral\_pragmatist#####

3-explicit-incr-cumul-long\_none###gemini-2.0-flash-001###none#####

3-explicit-incr-cumul-long\_analyst###gemini-2.0-flash-001###analyst#####

3-explicit-incr-cumul-long\_rapid\_executor###gemini-2.0-flash-001###rapid\_executor#####

3-explicit-incr-cumul-long\_strict\_moral\_custodian###gemini-2.0-flash-001###strict\_moral\_custodian#####

3-explicit-incr-cumul-  
long\_relaxed\_moral\_pragmatist###gemini-2.0-flash-001###relaxed\_moral\_pragmatist#####

4-explicit-start-cumul\_none###gemini-2.0-flash-001###none#####

4-explicit-start-cumul\_analyst###gemini-2.0-flash-001###analyst#####

4-explicit-start-cumul\_rapid\_executor###gemini-2.0-flash-001###rapid\_executor#####

4-explicit-start-cumul\_creativity\_inventor###gemini-2.0-flash-001###creativity\_inventor#####

4-explicit-start-  
cumul\_strict\_moral\_custodian###gemini-2.0-flash-001###strict\_moral\_custodian#####

4-explicit-start-  
cumul\_relaxed\_moral\_pragmatist###gemini-2.0-flash-001###relaxed\_moral\_pragmatist#####

5-explicit-incr\_none###gemini-2.0-flash-001###none#####

5-explicit-incr\_analyst###gemini-2.0-flash-001###analyst#####

5-explicit-incr\_rapid\_executor###gemini-2.0-flash-001###rapid\_executor#####

5-explicit-incr\_creativity\_inventor###gemini-2.0-flash-001###creativity\_inventor#####

5-explicit-incr\_strict\_moral\_custodian###gemini-2.0-flash-001###strict\_moral\_custodian#####

5-explicit-  
incr\_relaxed\_moral\_pragmatist###gemini-2.0-flash-001###relaxed\_moral\_pragmatist#####

6-implicit-incr-cumul\_none###gemini-2.0-flash-001###none#####

6-implicit-incr-cumul\_analyst###gemini-2.0-flash-001###analyst#####

6-implicit-incr-cumul\_rapid\_executor###gemini-2.0-flash-001###rapid\_executor#####

6-implicit-incr-cumul\_creativity\_inventor###gemini-2.0-flash-001###creativity\_inventor#####

6-implicit-incr-cumul\_strict\_moral\_custodian###gemini-2.0-flash-001###strict\_moral\_custodian#####

6-implicit-incr-cumul\_relaxed\_moral\_pragmatist###gemini-2.0-flash-001###relaxed\_moral\_pragmatist#####

7-implicit-start-cumul\_none###gemini-2.0-flash-001###none#####

7-implicit-start-cumul\_analyst###gemini-2.0-flash-001###analyst#####

7-implicit-start-cumul\_rapid\_executor###gemini-2.0-flash-001###rapid\_executor#####

7-implicit-start-cumul\_creativity\_inventor###gemini-2.0-flash-001###creativity\_inventor#####

7-implicit-start-cumul\_strict\_moral\_custodian###gemini-2.0-flash-001###strict\_moral\_custodian#####

7-implicit-start-cumul\_relaxed\_moral\_pragmatist###gemini-2.0-flash-001###relaxed\_moral\_pragmatist#####

8-implicit-incremental\_none###gemini-2.0-flash-001###none#####

8-implicit-incremental\_analyst###gemini-2.0-flash-001###analyst#####

8-implicit-incremental\_rapid\_executor###gemini-2.0-flash-001###rapid\_executor#####

8-implicit-incremental\_creativity\_inventor###gemini-2.0-flash-001###creativity\_inventor#####

8-implicit-incremental\_strict\_moral\_custodian###gemini-2.0-flash-001###strict\_moral\_custodian#####

8-implicit-incremental\_relaxed\_moral\_pragmatist###gemini-2.0-flash-001###relaxed\_moral\_pragmatist#####

3-explicit-incr-cumul-  
long\_creativity\_inventor###gemini-2.0-flash-001###creativity\_inventor#####
