# Supplementary material
Source: ML conference proceedings conference paper supplement (https://openreview.net/forum?id=R1SxYK1LCs)
Supplement: supplementary_material [file gpt-4.1-2025-04-14.pdf › inspect_evals-main/src/inspect_evals/agentmisalignment/evals/community_curator/results/notes_pdfs/gpt-4.1-2025-04-14.pdf]

1-baseline\_creativity\_inventor###gpt-4.1-2025-04-14###creativity\_inventor#####

1-baseline\_rapid\_executor###gpt-4.1-2025-04-14###rapid\_executor#####

2-explicit-incr-cumul\_rapid\_executor###gpt-4.1-2025-04-14###rapid\_executor#####

1-baseline\_strict\_moral\_custodian###gpt-4.1-2025-04-14###strict\_moral\_custodian#####

2-explicit-incr-cumul\_none###gpt-4.1-2025-04-14###none#####

1-baseline\_relaxed\_moral\_pragmatist###gpt-4.1-2025-04-14###relaxed\_moral\_pragmatist#####

1-baseline\_analyst###gpt-4.1-2025-04-14###analyst#####

2-explicit-incr-cumul\_creativity\_inventor###gpt-4.1-2025-04-14###creativity\_inventor#####

2-explicit-incr-cumul\_analyst###gpt-4.1-2025-04-14###analyst#####

1-baseline\_none###gpt-4.1-2025-04-14###none#####

2-explicit-incr-cumul\_relaxed\_moral\_pragmatist###gpt-4.1-2025-04-14###relaxed\_moral\_pragmatist#####

2-explicit-incr-cumul\_strict\_moral\_custodian###gpt-4.1-2025-04-14###strict\_moral\_custodian#####

4-explicit-start-cumul\_none###gpt-4.1-2025-04-14###none#####

4-explicit-start-cumul\_analyst###gpt-4.1-2025-04-14###analyst#####

4-explicit-start-cumul\_rapid\_executor###gpt-4.1-2025-04-14###rapid\_executor#####

4-explicit-start-cumul\_creativity\_inventor###gpt-4.1-2025-04-14###creativity\_inventor#####

4-explicit-start-

cumul\_strict\_moral\_custodian###gpt-4.1-2025-04-14###strict\_moral\_custodian#####

4-explicit-start-

cumul\_relaxed\_moral\_pragmatist###gpt-4.1-2025-04-14###relaxed\_moral\_pragmatist#####

5-explicit-incr\_none###gpt-4.1-2025-04-14###none#####

5-explicit-incr\_analyst###gpt-4.1-2025-04-14###analyst#####

5-explicit-incr\_rapid\_executor###gpt-4.1-2025-04-14###rapid\_executor#####

5-explicit-incr\_creativity\_inventor###gpt-4.1-2025-04-14###creativity\_inventor#####

5-explicit-incr\_strict\_moral\_custodian###gpt-4.1-2025-04-14###strict\_moral\_custodian#####

5-explicit-

incr\_relaxed\_moral\_pragmatist###gpt-4.1-2025-04-14###relaxed\_moral\_pragmatist#####

6-implicit-incr-cumul\_none###gpt-4.1-2025-04-14###none#####

6-implicit-incr-cumul\_analyst###gpt-4.1-2025-04-14###analyst#####

6-implicit-incr-cumul\_rapid\_executor###gpt-4.1-2025-04-14###rapid\_executor#####

6-implicit-incr-cumul\_creativity\_inventor###gpt-4.1-2025-04-14###creativity\_inventor#####

6-implicit-incr-

cumul\_strict\_moral\_custodian###gpt-4.1-2025-04-14###strict\_moral\_custodian#####

6-implicit-incr-

cumul\_relaxed\_moral\_pragmatist###gpt-4.1-2025-04-14###relaxed\_moral\_pragmatist#####

7-implicit-start-cumul\_none###gpt-4.1-2025-04-14###none#####

7-implicit-start-cumul\_analyst###gpt-4.1-2025-04-14###analyst#####

7-implicit-start-cumul\_rapid\_executor###gpt-4.1-2025-04-14###rapid\_executor#####

7-implicit-start-cumul\_creativity\_inventor###gpt-4.1-2025-04-14###creativity\_inventor#####

7-implicit-start-cumul\_strict\_moral\_custodian###gpt-4.1-2025-04-14###strict\_moral\_custodian#####

7-implicit-start-cumul\_relaxed\_moral\_pragmatist###gpt-4.1-2025-04-14###relaxed\_moral\_pragmatist#####

8-implicit-incremental\_none###gpt-4.1-2025-04-14###none#####

3-explicit-incr-cumul-long\_relaxed\_moral\_pragmatist###gpt-4.1-2025-04-14###relaxed\_moral\_pragmatist#####

8-implicit-incremental\_analyst###gpt-4.1-2025-04-14###analyst#####

3-explicit-incr-cumul-long\_rapid\_executor###gpt-4.1-2025-04-14###rapid\_executor#####

8-implicit-incremental\_rapid\_executor###gpt-4.1-2025-04-14###rapid\_executor#####

8-implicit-incremental\_creativity\_inventor###gpt-4.1-2025-04-14###creativity\_inventor#####

8-implicit-incremental\_strict\_moral\_custodian###gpt-4.1-2025-04-14###strict\_moral\_custodian#####

8-implicit-incremental\_relaxed\_moral\_pragmatist###gpt-4.1-2025-04-14###relaxed\_moral\_pragmatist#####

3-explicit-incr-cumul-long\_strict\_moral\_custodian###gpt-4.1-2025-04-14###strict\_moral\_custodian#####

3-explicit-incr-cumul-long\_none###gpt-4.1-2025-04-14###none#####

3-explicit-incr-cumul-long\_creativity\_inventor###gpt-4.1-2025-04-14###creativity\_inventor#####

3-explicit-incr-cumul-long\_analyst###gpt-4.1-2025-04-14###analyst#####
